# Supplementary material for: Resonantly hybridized excitons in moiré superlattices in van der Waals heterostructures
Source: Springer Nature journal article supplement (doi:10.1038/s41586-019-0986-9), 2019-03-06
Supplement: 41586_2019_986_MOESM1_ESM.pdf [file 41586_2019_986_MOESM1_ESM.pdf]

In the format provided by the authors and unedited.

# Resonantly hybridized excitons in moiré superlattices in van der Waals heterostructures

Evgeny M. Alexeev<sup>1</sup>, David A. Ruiz-Tijerina<sup>2,3,4</sup>, Mark Danovich<sup>2,3</sup>, Matthew J. Hamer<sup>2,3</sup>, Daniel J. Terry<sup>2,3</sup>, Pramoda K. Nayak<sup>5,6</sup>, Seongjoon Ahn<sup>5</sup>, Sangyeon Pak<sup>7</sup>, Juwon Lee<sup>7</sup>, Jung Inn Sohn<sup>7,8</sup>, Maciej R. Molas<sup>3,9</sup>, Maciej Koperski<sup>2,3</sup>, Kenji Watanabe<sup>10</sup>, Takashi Taniguchi<sup>10</sup>, Kostya S. Novoselov<sup>2,3</sup>, Roman V. Gorbachev<sup>2,3,11</sup>, Hyeon Suk Shin<sup>5</sup>, Vladimir I. Fal'ko<sup>2,3,11\*</sup> & Alexander I. Tartakovskii<sup>1\*</sup>

---

<sup>1</sup>Department of Physics and Astronomy, University of Sheffield, Sheffield, UK. <sup>2</sup>School of Physics and Astronomy, University of Manchester, Oxford Road, Manchester, UK. <sup>3</sup>National Graphene Institute, University of Manchester, Manchester, UK. <sup>4</sup>Centro de Nanociencias y Nanotecnología, Universidad Nacional Autónoma de México, Ensenada, Mexico. <sup>5</sup>Department of Energy Engineering and Department of Chemistry, Ulsan National Institute of Science and Technology (UNIST), Ulsan, South Korea. <sup>6</sup>Department of Physics, Indian Institute of Technology Madras, Chennai, India. <sup>7</sup>Department of Engineering Science, University of Oxford, Oxford, UK. <sup>8</sup>Division of Physics and Semiconductor Science, Dongguk University-Seoul, Seoul, South Korea. <sup>9</sup>Institute of Experimental Physics, Faculty of Physics, University of Warsaw, Warsaw, Poland. <sup>10</sup>National Institute for Materials Science, Tsukuba, Japan. <sup>11</sup>Henry Royce Institute for Advanced Materials, Manchester, UK. \*e-mail: [vladimir.falko@manchester.ac.uk](mailto:vladimir.falko@manchester.ac.uk); [a.tartakovskii@sheffield.ac.uk](mailto:a.tartakovskii@sheffield.ac.uk)

# Supplementary Information for Resonantly hybridized excitons in moiré superlattices in van der Waals heterostructures

Evgeny M. Alexeev,<sup>1</sup> David A. Ruiz-Tijerina,<sup>2,3,4</sup> Mark Danovich,<sup>2,3</sup> Matthew J. Hamer,<sup>2,3</sup> Daniel J. Terry,<sup>2,3</sup> Pramoda K. Nayak,<sup>5,6</sup> Seongjoon Ahn,<sup>5</sup> Sangyeon Pak,<sup>7</sup> Juwon Lee,<sup>7</sup> Jung Inn Sohn,<sup>7,8</sup> Maciej Molas,<sup>9,3</sup> Maciej Koperski,<sup>2,3</sup> Kenji Watanabe,<sup>10</sup> Takashi Taniguchi,<sup>10</sup> Kostya S. Novoselov,<sup>2,3</sup> Roman Gorbachev,<sup>11,2,3</sup> Hyeon Suk Shin,<sup>5</sup> Vladimir I. Fal'ko,<sup>2,3,11,\*</sup> and Alexander I. Tartakovskii<sup>1,†</sup>

<sup>1</sup>*Department of Physics and Astronomy,  
University of Sheffield, Sheffield S3 7RH, UK*

<sup>2</sup>*School of Physics and Astronomy, University of Manchester,  
Oxford Road, Manchester M13 9PL, UK*

<sup>3</sup>*National Graphene Institute, University of Manchester,  
Booth Street East, Manchester M13 9PL, UK*

<sup>4</sup>*Centro de Nanociencias y Nanotecnología,  
Universidad Nacional Autónoma de México,  
Apdo. Postal 14, 22800 Ensenada, Baja California, México*

<sup>5</sup>*Department of Energy Engineering and Department of Chemistry,  
Ulsan National Institute of Science and Technology (UNIST),  
50 UNIST-gil, Ulsan 44919, Republic of Korea*

<sup>6</sup>*Department of Physics, Indian Institute of Technology Madras, Chennai 600036, India*

<sup>7</sup>*Department of Engineering Science,  
University of Oxford, Oxford OX1 3PJ, UK*

<sup>8</sup>*Division of Physics and Semiconductor Science,  
Dongguk University-Seoul, Seoul 04620, South Korea*

<sup>9</sup>*Institute of Experimental Physics, Faculty of Physics,  
University of Warsaw, ul. Pasteura 5, 02-093 Warszawa, Poland*

<sup>10</sup>*National Institute for Materials Science,  
1-1 Namiki, Tsukuba 305-0044, Japan*

<sup>11</sup>*Henry Royce Institute for Advanced Materials,  
University of Manchester, Manchester M13 9PL, UK*

---

\* Corresponding author: [vladimir.falko@manchester.ac.uk](mailto:vladimir.falko@manchester.ac.uk)

† Corresponding author: [a.tartakovskii@sheffield.ac.uk](mailto:a.tartakovskii@sheffield.ac.uk)

## I. SUPPLEMENTARY NOTES

### 1. Model for intralayer-interlayer exciton hybridization and moiré superlattice minibands for excitons

Bright MoSe<sub>2</sub> excitons are formed in an MoSe<sub>2</sub>/WS<sub>2</sub> heterobilayer by  $\tau\mathbf{K}_{\text{MoSe}_2}$  valley electrons and  $-\tau\mathbf{K}_{\text{MoSe}_2}$  holes of opposite spins, where  $\tau = \pm 1$  is the valley index. For  $\tau = 1$ , the intralayer exciton state is

$$|X_s(\mathbf{Q})\rangle = \frac{1}{\sqrt{S}} \sum_{\boldsymbol{\kappa}} \tilde{\varphi}(\boldsymbol{\kappa}) c_{M,s}^\dagger(\mathbf{K}_{\text{MoSe}_2} + \frac{m_e}{M_X} \mathbf{Q} + \boldsymbol{\kappa}) h_{M,-s}^\dagger(-\mathbf{K}_{\text{MoSe}_2} + \frac{m_h}{M_X} \mathbf{Q} - \boldsymbol{\kappa}) |\Omega\rangle, \quad (1)$$

where  $c_{M,s}^\dagger(\mathbf{K}_{\text{MoSe}_2} + \mathbf{k})$  [ $h_{M,s}^\dagger(\mathbf{K}_{\text{MoSe}_2} + \mathbf{k})$ ] creates an electron (hole) in the MoSe<sub>2</sub> spin- $s$  conduction (valence) band, with wave vector  $\mathbf{k}$  near  $\mathbf{K}_{\text{MoSe}_2}$  ( $s = \downarrow$  gives the A exciton,  $X_A$ , while  $s = \uparrow$  gives the B exciton,  $X_B$ ). The same is true for WS<sub>2</sub>), and  $\tilde{\varphi}(\boldsymbol{\kappa})$  is the Fourier transform of the (ground-state) exciton relative-motion wavefunction.  $m_e$  and  $m_h$  are the electron and hole effective masses;  $M_X = m_e + m_h$ , and  $|\Omega\rangle$  is the heterobilayer ground state.

MoSe<sub>2</sub> electrons tunnel into the WS<sub>2</sub> conduction band through the ‘‘hopping term’’ [1],

$$t = \sum_{s,\tau'=\pm 1} \sum_{m,n} \sum_{\mathbf{k},\mathbf{k}'} \delta_{(\mathbf{K}_{\text{MoSe}_2} + \mathbf{k}) - (\tau'\mathbf{K}_{\text{WS}_2} + \mathbf{k}'), \mathbf{G}_n^{\text{WS}_2} - \mathbf{G}_m^{\text{MoSe}_2}} t_{cc}(\mathbf{G}_m^{\text{MoSe}_2} + \mathbf{K}_{\text{MoSe}_2} + \mathbf{k}) \\ \times \left[ e^{-i\mathbf{G}_m^{\text{MoSe}_2} \cdot \mathbf{r}_0} c_{W,s}^\dagger(\tau'\mathbf{K}_{\text{WS}_2} + \mathbf{k}') c_{M,s}(\mathbf{K}_{\text{MoSe}_2} + \mathbf{k}) + \text{H.c.} \right],$$

where  $\mathbf{G}_m^{\text{MoSe}_2}$  and  $\mathbf{G}_n^{\text{WS}_2}$  are reciprocal lattice vectors of the corresponding crystals, and  $\mathbf{r}_0$  represents the in-plane shift between metal atoms in the two layers, which together with the twist angle  $\theta$  parametrizes the heterobilayer stacking. The Kronecker delta encodes momentum conservation. Due to symmetry under  $C_3$  rotations, the valley  $-\mathbf{K}_{\text{WS}_2}$  is equivalent to  $\mathbf{K}'_{\text{WS}_2}$  (see main text Fig. 3a).

Intralayer MoSe<sub>2</sub> excitons can hybridize with interlayer excitons (iXs) of same quantum number  $s$ , (WS<sub>2</sub> electron and an MoSe<sub>2</sub> hole)

$$|Y_s^{\tau'}(\mathbf{Q}')\rangle = \frac{1}{\sqrt{S}} \sum_{\boldsymbol{\kappa}} \tilde{\psi}(\boldsymbol{\kappa}) c_{W,s}^\dagger(\tau'\mathbf{K}_{\text{WS}_2} + \frac{m'_e}{M_{\text{iX}}} \mathbf{Q}' + \boldsymbol{\kappa}) h_{M,-s}^\dagger(-\mathbf{K}_{\text{MoSe}_2} + \frac{m_h}{M_Y} \mathbf{Q}' - \boldsymbol{\kappa}) |\Omega\rangle, \quad (2)$$

where  $m'_e$  is the WS<sub>2</sub> electron effective mass and  $M_{\text{iX}} = m'_e + m_h$  (see Extended Data Table I).

The relative-motion momentum-space wavefunctions of both exciton species are given by

$$\tilde{\varphi}(\boldsymbol{\kappa}) = \int d^2\rho e^{-i\boldsymbol{\kappa} \cdot \boldsymbol{\rho}} \varphi(\boldsymbol{\rho}), \quad \tilde{\psi}(\boldsymbol{\kappa}) = \int d^2\rho e^{-i\boldsymbol{\kappa} \cdot \boldsymbol{\rho}} \psi(\boldsymbol{\rho}),$$

and we obtained the real-space wavefunctions

$$\varphi(\rho) \approx \sqrt{\frac{2}{\pi a_X^2}} e^{-\rho/a_X}, \quad \psi(\rho) \approx \sqrt{\frac{2}{\pi a_{iX}^2}} e^{-\rho/a_{iX}},$$

by solving numerically the two-body problem with bilayer Keldysh-type interactions [2–6], finding  $a_X$  and  $a_{iX}$  from the solutions. Then, we obtain the bright inter-intra exciton mixing term

$$T = \sum_{s,\tau'} \sum_{m,n} \sum_{\mathbf{Q},\mathbf{Q}'} T_{\tau'}(\mathbf{G}_m^{\text{MoSe}_2}, \mathbf{G}_n^{\text{WS}_2}) \delta_{\mathbf{Q}-\mathbf{Q}', \Delta\mathbf{K}_{\tau'} + \mathbf{G}_n^{\text{WS}_2} - \mathbf{G}_m^{\text{MoSe}_2}} Y_s^{\tau'\dagger}(\mathbf{Q}') X_s(\mathbf{Q}) + \text{H.c.}$$

$$T_{\tau'}(\mathbf{G}, \mathbf{G}') \approx \frac{4t_{cc}(\mathbf{K}_{\text{MoSe}_2} + \mathbf{G}) e^{-i\mathbf{G}\cdot\mathbf{r}_0}}{a_X a_{iX}} \left( \frac{a_X + a_{iX}}{a_X a_{iX}} \right) \left[ \left( \frac{a_X + a_{iX}}{a_X a_{iX}} \right)^2 + \frac{m_h^2}{M_{iX}^2} (\Delta\mathbf{K}_{\tau'} + \mathbf{G}' - \mathbf{G})^2 \right]^{-3/2}, \quad (3)$$

where  $\Delta\mathbf{K}_{\tau'} = \tau' \mathbf{K}_{\text{WS}_2} - \mathbf{K}_{\text{MoSe}_2}$ ;  $\Delta\mathbf{K} \equiv \Delta\mathbf{K}_+$  and  $\Delta\mathbf{K}' \equiv \Delta\mathbf{K}_-$ ; and  $X_s(\mathbf{Q})$ ,  $Y_s^{\tau'}(\mathbf{Q}')$  are exciton annihilation operators.

The coupling function  $t_{cc}(\mathbf{q})$  decays rapidly with wave vector for  $|\mathbf{q}| > |\mathbf{K}_{\text{MoSe}_2}|$  [1, 7], which allows us to set it as a constant  $t_{cc}$  for  $|\mathbf{q}| \lesssim |\mathbf{K}_{\text{MoSe}_2}|$ , and zero otherwise. This makes  $T_{\tau'}(\mathbf{G}, \mathbf{G}')$  finite only for  $\mathbf{G} = 0$  and the two other MoSe<sub>2</sub> Bragg vectors shown in Extended Data Fig. 3c. For closely aligned ( $\theta \approx 0^\circ$ ) configurations, when  $\mathbf{G} = \mathbf{G}_n^{\text{MoSe}_2}$ , the hopping term gives significant contributions only if  $\tau' = 1$  and  $\mathbf{G}' = \mathbf{G}_n^{\text{WS}_2}$ , and is vanishingly small otherwise. Thus, the allowed Bragg vector combinations give

$$\Delta\mathbf{K} + \mathbf{G}' - \mathbf{G} = \begin{cases} \Delta\mathbf{K} & , \quad \mathbf{G}' = \mathbf{G} = 0 \\ C_3 \Delta\mathbf{K} & , \quad \mathbf{G}' = \mathbf{G}_2^{\text{WS}_2}, \mathbf{G} = \mathbf{G}_2^{\text{MoSe}_2} \\ C_3^2 \Delta\mathbf{K} & , \quad \mathbf{G}' = -\mathbf{G}_1^{\text{WS}_2}, \mathbf{G} = -\mathbf{G}_1^{\text{MoSe}_2} \end{cases}.$$

Therefore, to a good approximation,

$$T = \sum_s \sum_{\mathcal{D}} \sum_{\mathbf{Q},\mathbf{Q}'} \delta_{\mathbf{Q}-\mathbf{Q}', \mathcal{D}\Delta\mathbf{K}} T_{\mathcal{D}} Y_s^{\dagger}(\mathbf{Q}') X_s(\mathbf{Q}) + \text{H.c.},$$

$$T_{\mathcal{D}} = e^{i\mathbf{K}\cdot\mathbf{r}_0} \frac{4t_{cc} e^{-i\mathcal{D}\mathbf{K}\cdot\mathbf{r}_0}}{a_X a_{iX}} \left( \frac{a_X + a_{iX}}{a_X a_{iX}} \right) \left[ \left( \frac{a_X + a_{iX}}{a_X a_{iX}} \right)^2 + \frac{m_h^2}{M_{iX}^2} \Delta K^2 \right]^{-3/2},$$

where we define  $\mathcal{D} \in \{E, C_3, C_3^2\}$ , with  $C_3^n$  a rotation by  $\frac{2n\pi}{3}$  and  $E$  the identity.

For  $\theta \approx 60^\circ$  one must choose  $\tau' = -1$  and for each Bragg vector  $\mathbf{G} = \mathbf{G}_n^{\text{MoSe}_2}$  take  $\mathbf{G}' = -C_3 \mathbf{G}_n^{\text{WS}_2}$ , resulting in

$$\tilde{T} = \sum_s \sum_{\mathcal{D}} \sum_{\mathbf{Q},\mathbf{Q}'} \delta_{\mathbf{Q}-\mathbf{Q}', \mathcal{D}\Delta\mathbf{K}'} \tilde{T}_{\mathcal{D}} Y_s^{-\dagger}(\mathbf{Q}') X_s(\mathbf{Q}) + \text{H.c.}$$

From the above analysis, we get for  $\tau = 1$  the exciton Hamiltonians

$$H = \sum_s \sum_{\mathbf{Q}} [\mathcal{E}_{X,s}(\mathbf{Q})X_s^\dagger(\mathbf{Q})X_s(\mathbf{Q}) + \mathcal{E}_{iX,s}^+(\mathbf{Q})Y_s^{+\dagger}(\mathbf{Q})Y_s^+(\mathbf{Q})] + T; \quad \theta < 30^\circ, \quad (4a)$$

$$H = \sum_s \sum_{\mathbf{Q}} [\mathcal{E}_{X,s}(\mathbf{Q})X_s^\dagger(\mathbf{Q})X_s(\mathbf{Q}) + \mathcal{E}_{iX,s}^-(\mathbf{Q})Y_s^{-\dagger}(\mathbf{Q})Y_s^-(\mathbf{Q})] + \tilde{T}; \quad \theta > 30^\circ, \quad (4b)$$

where

$$\begin{aligned} \mathcal{E}_{X,s}(\mathbf{Q}) &= E_X^0 + s(\Delta_{\text{SO}}^v + \Delta_{\text{SO}}^c) + \frac{\hbar^2 Q^2}{2M_X}, \\ \mathcal{E}_{iX,s}^{\tau'}(\mathbf{Q}) &= E_{iX}^0 + s(\Delta_{\text{SO}}^v + \tau' \Delta_{\text{SO}}^c) + \frac{\hbar^2 Q^2}{2M_{iX}}, \end{aligned}$$

with  $\Delta_{\text{SO}}^c$  and  $\Delta_{\text{SO}}^v$  the spin-orbit couplings of the MoSe<sub>2</sub> conduction and valence bands, and  $\Delta_{\text{SO}}^c$  the WS<sub>2</sub> conduction band spin-orbit coupling. Thus, for  $Q = 0$ , the A- and B-exciton energies can be written as (see Extended Data Table I)  $E_{X_A} = E_X^0 - (\Delta_{\text{SO}}^v + \Delta_{\text{SO}}^c)$  and  $E_{X_B} = E_X^0 + (\Delta_{\text{SO}}^v + \Delta_{\text{SO}}^c)$ . Analogous terms exist for the  $\tau = -1$  valley, given by a time reversal transformation.

The moiré superlattice periodicity, introduced in Eqs. (4a) and (4b) through the terms  $T$  and  $\tilde{T}$ , requires that we fold the X and iX bands onto the moiré Brillouin zone,

$$|X_s(\mathbf{Q})\rangle_{m,n} \equiv |X_s(\mathbf{Q} + m\mathbf{b}_1 + n\mathbf{b}_2)\rangle,$$

$$|Y_s^{\tau'}(\mathbf{Q}')\rangle_{m,n} \equiv |Y_s^{\tau'}(\mathbf{Q}' + m\mathbf{b}_1 + n\mathbf{b}_2)\rangle,$$

where  $\mathbf{Q}$  is limited to the first moiré Brillouin zone (mBZ, Extended Data Fig. 3e). The intra- and interlayer exciton states  $|X_s(\mathbf{Q})\rangle_{m,n}$  and  $|Y_s^{\tau'}(\mathbf{Q}')\rangle_{m',n'}$  hybridize when  $\mathbf{Q} = \mathbf{Q}'$  and

$$(m' - m)\mathbf{b}_1 + (n' - n)\mathbf{b}_2 = \mathbf{b}_j; \quad j = \pm 1, \pm 2, \pm 3,$$

producing hXs states

$$|\text{hX}_s^{\tau'}(\mathbf{Q})\rangle_{i,j} \equiv \sum_{m,n=0}^{\infty} \left[ A_{i,j}^{m,n}(s, \mathbf{Q}) |X_s(\mathbf{Q})\rangle_{m,n} + B_{i,j}^{m,n}(s, \tau', \mathbf{Q}) |Y_s^{\tau'}(\mathbf{Q})\rangle_{m,n} \right], \quad \mathbf{Q} \in \text{mBZ},$$

with corresponding energies  $E_{s;i,j}^{\tau'}(\mathbf{Q})$ .

To evaluate the optical spectra of hX states, we use the light-matter interaction Hamiltonian

$$H_{\text{LM}} = \frac{e\gamma}{\hbar c} \sum_s \sum_{\eta=\pm 1} \sum_{\boldsymbol{\xi}, \xi_z} \sum_{\mathbf{k}} \sqrt{\frac{4\pi\hbar c}{V\xi}} c_{M,s}^\dagger(\eta\mathbf{K}_{\text{MoSe}_2} + \mathbf{k} - \boldsymbol{\xi}) h_{M,s}^\dagger(-\eta\mathbf{K}_{\text{MoSe}_2} - \mathbf{k}) a_\eta^\dagger(\boldsymbol{\xi}, \xi_z) + \text{H.c.}$$

Here,  $a_\eta^\dagger(\boldsymbol{\xi}, \xi_z)$  creates a photon of in-plane momentum  $\boldsymbol{\xi}$  and out-of-plane momentum  $\xi_z$ , and polarization  $\eta = \pm 1$ , corresponding to counter-clockwise and clockwise, respectively. We obtain the recombination and absorption rates from Fermi's golden rule ( $\mathbf{Q} + m\mathbf{b}_1 + n\mathbf{b}_2 = \boldsymbol{\xi}$ ):

$$\Gamma_{\text{PL};m,n;s}^{\tau'}(\mathbf{Q}) = \frac{4\pi}{\hbar} \sum_{\boldsymbol{\xi}, \xi_z} |\langle \eta; \boldsymbol{\xi}, \xi_z | H_{\text{LM}} | \text{hX}_s^{\tau'}(\mathbf{Q}) \rangle_{m,n}|^2 n_{\text{B}}(E_{s;m,n}^{\tau',T}) \delta(E_{s;m,n}^{\tau'}(\mathbf{Q}) - \hbar c \sqrt{|\boldsymbol{\xi}|^2 + \xi_z^2}),$$

$$\Gamma_{\text{A}}^\eta(\boldsymbol{\xi}, \xi_z) = \frac{2\pi}{\hbar} \sum_s \sum_{m,n} \sum_{\mathbf{Q}} |_{m,n} \langle \text{hX}_s^{\tau'}(\mathbf{Q}) | H_{\text{LM}} | \eta; \boldsymbol{\xi}, \xi_z \rangle|^2 \delta(E_{s;m,n}^{\tau'}(\mathbf{Q}) - \hbar c \sqrt{|\boldsymbol{\xi}|^2 + \xi_z^2}),$$

For PL, we take into account temperature effects through the Bose-Einstein distribution

$$n_{\text{B}}(E, T) = \frac{1}{e^{(E-E_{\text{gnd}})/k_{\text{B}}T} + 1},$$

where  $E_{\text{gnd}}$  is the energy of the lowest exciton state. The calculated twist-angle dependence of the activation energy  $E_{\downarrow;0,0}(0) - E_{\text{gnd}}$  for  $\text{hX}_1$  in  $\text{MoSe}_2/\text{WS}_2$ , as well as PL spectra at several temperatures, are shown in Extended Data Fig. 8.

For absorption, we find [8]

$$I_{\text{A}}^s(\hbar\omega) = \frac{8\omega\delta\omega}{\hbar\pi c^2} \frac{e^2}{\hbar c} \sum_{m,n} \left| \sum_{i,j} \frac{\gamma A_{m,n}^{i,j}(s, 0)}{a_{\text{X}}} \right|^2 \frac{\beta/\pi}{(\hbar\omega - E_{s;m,n}^{\tau'}(0))^2 + \beta^2},$$

where we use  $\beta = 5 \text{ meV}$  and  $\hbar\delta\omega = 1 \text{ meV}$  to evaluate the spectrum shown in Fig. 3e.

## 2. Harmonic potential approximation to exciton moiré effects in $\text{MoSe}_2/\text{WS}_2$ heterostructures

The moiré superlattice effects on the band structure [9, 10] and exciton energies [7] of bilayer systems, produced by incommensurability and misalignment of the two lattices, are often described in terms of a minimal harmonic potential [11–13]. In this section we derive the tunnelling contribution to this potential for intralayer excitons in TMD heterobilayers, using  $\text{MoSe}_2/\text{WS}_2$  as a case study. We show that a harmonic potential fails to describe the moiré superlattice effects in the close alignment (anti-alignment) regime in the case of near-resonant exciton bands.

For  $\theta < 30^\circ$ , interlayer tunnelling  $T$  allows  $\text{MoSe}_2$  intralayer excitons to explore the reciprocal lattice of the  $\text{WS}_2$  layer through virtual tunneling of their electrons onto the  $\text{WS}_2$  conduction band, and then back onto the  $\text{MoSe}_2$  conduction band. These virtual processes

introduce momentum-dependent corrections to the intralayer exciton energies, which in real space correspond to a potential.

Focusing on the case of  $\theta < 30^\circ$ , we perform a canonical transformation  $\tilde{H} = e^{iS} H e^{-iS}$  on the intralayer-interlayer exciton Hamiltonian  $H = H_0 + T$  presented in main text Eq. (4a), with the condition [14]

$$T = -i [S, H_0], \quad (8)$$

which removes from  $\tilde{H}$  all terms that are first order in  $T$ . A similar procedure is followed for the Hamiltonian of main text Eq. (4b), for  $\theta > 30^\circ$ . The condition Eq. (8) is achieved by the generator

$$iS = \sum_s \sum_{\mathcal{D}} \sum_{\mathbf{Q}, \mathbf{Q}'} \delta_{\mathbf{Q}, \mathbf{Q}' + \mathcal{D}\Delta\mathbf{K}} \left[ \frac{T_{\mathcal{D}}}{\mathcal{E}_{iX,s}^+(\mathbf{Q}') - \mathcal{E}_{X,s}(\mathbf{Q})} Y_s^{+\dagger}(\mathbf{Q}') X_s(\mathbf{Q}) - \text{H.c.} \right] \quad (9)$$

Evaluating  $\tilde{H}$  up to second order in  $T$  we obtain

$$\begin{aligned} \tilde{H} \approx & \sum_s \sum_{\mathbf{Q}} \left[ \tilde{E}_{X,s}(\mathbf{Q}) X_s^\dagger(\mathbf{Q}) X_s(\mathbf{Q}) + \tilde{E}_{iX,s}(\mathbf{Q}) Y_s^{+\dagger}(\mathbf{Q}) Y_s^+(\mathbf{Q}) \right] \\ & + \frac{1}{2} \sum_s \sum_{\mathcal{D} \neq \mathcal{D}'} \sum_{\mathbf{Q}} \left[ \frac{T_{\mathcal{D}}^* T_{\mathcal{D}'}}{\mathcal{E}_{iX,s}^+(\mathbf{Q}) - \mathcal{E}_{X,s}^+(\mathbf{Q} + \mathcal{D}\Delta\mathbf{K})} Y_s^{+\dagger}(\mathbf{Q} + [\mathcal{D} - \mathcal{D}']\Delta\mathbf{K}) Y_s^+(\mathbf{Q}) + \text{H.c.} \right] \\ & - \frac{1}{2} \sum_s \sum_{\mathcal{D} \neq \mathcal{D}'} \sum_{\mathbf{Q}} \left[ \frac{T_{\mathcal{D}}^* T_{\mathcal{D}'}}{\mathcal{E}_{iX,s}^+(\mathbf{Q} - \mathcal{D}\Delta\mathbf{K}) - \mathcal{E}_{X,s}^+(\mathbf{Q})} X_s^\dagger(\mathbf{Q} + [\mathcal{D} - \mathcal{D}']\Delta\mathbf{K}) X_s(\mathbf{Q}) + \text{H.c.} \right], \end{aligned} \quad (10)$$

with the renormalized energies

$$\tilde{E}_{X,s}^\tau(\mathbf{Q}) = \mathcal{E}_{X,s}^\tau(\mathbf{Q}) - \frac{1}{2} \sum_{\mathcal{D}} \frac{|T_{\mathcal{D}}|^2}{\mathcal{E}_{Y,s}^\tau(\mathbf{Q} - \mathcal{D}\Delta\mathbf{K}_\tau) - \mathcal{E}_{X,s}^\tau(\mathbf{Q})}, \quad (11a)$$

$$\tilde{E}_{iX,s}^{\tau\tau'}(\mathbf{Q}) = \mathcal{E}_{Y,s}^\tau(\mathbf{Q}) + \frac{1}{2} \sum_{\mathcal{D}} \frac{|T_{\mathcal{D}}|^2}{\mathcal{E}_{Y,s}^\tau(\mathbf{Q}) - \mathcal{E}_{X,s}^\tau(\mathbf{Q} + \mathcal{D}\Delta\mathbf{K}_\tau)}. \quad (11b)$$

The remaining two terms represent scattering by moiré vectors  $\mathbf{b} = (\mathcal{D} - \mathcal{D}')\Delta\mathbf{K}_\tau$ , as shown in Extended Data Fig. 3e. For exciton momenta near the center of the moiré Brillouin zone we have  $Q \ll \Delta K$ , and we may approximate

$$\frac{T_{\mathcal{D}}^* T_{\mathcal{D}'}}{\mathcal{E}_{iX,s}^+(\mathbf{Q}) - \mathcal{E}_{X,s}^+(\mathbf{Q} + \mathcal{D}\Delta\mathbf{K})} \approx \frac{T_{\mathcal{D}}^* T_{\mathcal{D}'}}{[(E_{iX}^0 - \Delta'_{SO}) - (E_X^0 - \Delta_{SO})] - \frac{\hbar^2 \Delta K^2}{2M_X}}, \quad (12a)$$

$$\frac{T_{\mathcal{D}}^* T_{\mathcal{D}'}}{\mathcal{E}_{iX,s}^+(\mathbf{Q} - \mathcal{D}\Delta\mathbf{K}) - \mathcal{E}_{X,s}^+(\mathbf{Q})} \approx \frac{T_{\mathcal{D}}^* T_{\mathcal{D}'}}{[(E_{iX}^0 - \Delta'_{SO}) - (E_X^0 - \Delta_{SO})] + \frac{\hbar^2 \Delta K^2}{2M_{iX}}}. \quad (12b)$$



Finally, an inverse Fourier transform gives the harmonic potential for bright intralayer excitons at valley  $\tau = 1$

$$V_{X,s}(\mathbf{r}) = \sum_{n=1}^3 \frac{T_{C_3^{n-1}}^* T_{C_3^{n-2}} e^{-i\mathbf{d}_n \cdot \mathbf{r}} + T_{C_3^{n-2}}^* T_{C_3^{n-1}} e^{i\mathbf{d}_n \cdot \mathbf{r}}}{[(E_{iX}^0 - \Delta'_{SO}) - (E_X^0 - \Delta_{SO})] + \frac{\hbar^2 \Delta K^2}{2M_{iX}}}, \quad (13)$$

where  $C_3^0 = E$ , and for convenience we have re-labeled the moiré Bragg vectors as follows:  $\mathbf{d}_1 = \mathbf{b}_1$ ,  $\mathbf{d}_2 = \mathbf{b}_3$  and  $\mathbf{d}_3 = -\mathbf{b}_2$ . A similar analysis for  $\theta > 30^\circ$  leads to the potential

$$W_{X,s}(\mathbf{r}) = \sum_{n=1}^3 \frac{\tilde{T}_{C_3^{n-1}}^* \tilde{T}_{C_3^{n-2}} e^{-i\tilde{\mathbf{d}}_n \cdot \mathbf{r}} + \tilde{T}_{C_3^{n-2}}^* \tilde{T}_{C_3^{n-1}} e^{i\tilde{\mathbf{d}}_n \cdot \mathbf{r}}}{[(E_{iX}^0 + \Delta'_{SO}) - (E_X^0 - \Delta_{SO})] + \frac{\hbar^2 \Delta K'^2}{2M_{iX}}}. \quad (14)$$

Using the values of Extended Data Table I, we find that  $W_{X,s}(\mathbf{r})$  diverges at  $\theta \approx 58^\circ$ , signaling the breakdown of perturbation theory due to a crossing between the intralayer and interlayer exciton bands at the iX band edge, as shown in Extended Data Fig. 2b. Furthermore, Extended Data Fig. 2c shows that, although  $V_{X,s}(\mathbf{r})$  remains finite for all  $\theta < 30^\circ$ , the excitation energy in the virtual process becomes smaller than the mixing energy for  $\theta < 5^\circ$ , indicating that the perturbative approach is no longer valid.

Beyond these angles the intralayer-interlayer exciton mixing strength becomes the dominant energy scale in the problem, such that perturbative methods in general, and a simple description in terms of a potential in particular, cannot describe hX states or the moiré superlattice effects. This is a direct consequence of the near-resonant conduction bands in MoSe<sub>2</sub>/WS<sub>2</sub> heterostructures.

### 3. Broadening of the photoluminescence line by random fields in the sample

The dependence on twist angle of the emission line broadening shown in Extended Data Fig. 1b may be explained by the coupling of weak electric fields produced by random strain throughout the sample, with the out-of-plane electric dipole of the mixed intralayer-interlayer

exciton states. The field-dipole coupling can be estimated as

$$\begin{aligned}
H_{\text{E-D}} = & -\frac{edE_z}{2} \sum_s \sum_{\tau=\pm 1} \left[ \sum_{\mathbf{k}} c_{\text{M},s}^\dagger(\tau\mathbf{K}_{\text{MoSe}_2} + \mathbf{k}) c_{\text{M},s}(\tau\mathbf{K}_{\text{MoSe}_2} + \mathbf{k}) \right. \\
& \left. - \sum_{\mathbf{k}'} c_{\text{W},s}^\dagger(\tau\mathbf{K}_{\text{WS}_2} + \mathbf{k}') c_{\text{W},s}(\tau\mathbf{K}_{\text{WS}_2} + \mathbf{k}') \right] \\
& + \frac{edE_z}{2} \sum_s \sum_{\tau=\pm 1} \left[ \sum_{\mathbf{k}} h_{\text{M},s}^\dagger(\tau\mathbf{K}_{\text{MoSe}_2} + \mathbf{k}) h_{\text{M},s}(\tau\mathbf{K}_{\text{MoSe}_2} + \mathbf{k}) \right. \\
& \left. - \sum_{\mathbf{k}'} h_{\text{W},s}^\dagger(\tau\mathbf{K}_{\text{WS}_2} + \mathbf{k}') h_{\text{W},s}(\tau\mathbf{K}_{\text{WS}_2} + \mathbf{k}') \right], \tag{15}
\end{aligned}$$

where  $c_{\text{M},s}(\mathbf{q})$  and  $c_{\text{W},s}(\mathbf{q})$  annihilate an electron of momentum  $\mathbf{q}$  and spin projection  $s$  in MoSe<sub>2</sub> and WS<sub>2</sub>, respectively;  $e$  is the charge unit,  $d$  the interlayer distance, and we assume that the out-of-plane electric field  $E_z$  is small. In first-order perturbation theory, this gives a correction to the bright, optically-active ( $Q = 0$ ) mixed exciton energy

$$\delta E = {}_{0,0} \langle \text{hX}_\downarrow(0) | H_{\text{E-D}} | \text{hX}_\downarrow(0) \rangle_{0,0} = edE_z \left| \langle \text{Y}_\downarrow^{\tau'}(0) | \text{hX}_\downarrow(0) \rangle_{0,0} \right|^2, \tag{16}$$

where  $\tau' = 1$  ( $\tau' = -1$ ) for  $\theta < 30^\circ$  ( $\theta \geq 30^\circ$ ),  $|\text{hX}_\downarrow(0)\rangle_{0,0}$  is the lowest bright hybridized exciton state, and  $\langle \text{Y}_\downarrow^{\tau'}(0) | \text{hX}_\downarrow(0) \rangle_{0,0}$  is its interlayer exciton component (see Methods in main text). Excitons in different parts of the sample will experience different values of  $E_z$ . Assuming that the  $E_z$  values found throughout the sample follow a Gaussian distribution

$$\rho(E_z) = \sqrt{\frac{1}{2\pi\sigma^2}} e^{-(E_z - E_z^0)^2 / 2\sigma^2}, \tag{17}$$

of mean  $E_z^0$  and variance  $\sigma^2$ , the correction  $\delta E$  will also be normally distributed, with mean value

$$\langle \delta E \rangle_\rho = edE_z^0 \left| \langle \text{Y}_\downarrow^{\tau'}(0) | \text{hX}_\downarrow(0) \rangle_{0,0} \right|^2, \tag{18}$$

and a full width at half maximum given by

$$\text{FWHM}_{\delta E} = 2\sqrt{2\log 2} \sqrt{\langle \delta E^2 \rangle_\rho - \langle \delta E \rangle_\rho^2} = 2\sigma\sqrt{2\log 2} ed \left| \langle \text{Y}_\downarrow^{\tau'}(0) | \text{hX}_\downarrow(0) \rangle_{0,0} \right|^2. \tag{19}$$

Allowing for an additive constant, representing the intrinsic broadening of the PL line, we fitted Eq. (19) to the experimental data, and the result is presented in Extended Data Fig. 1b of the main text. The fitting parameters give  $\sigma ed = 19.8$  meV, or  $\sigma \approx 0.03$  V/nm, assuming an approximate interlayer distance of 6 Å [15].

## II. REFERENCES

---

- [1] Wang, Y., Wang, Z., Yao, W., Liu, G. B. & Yu, H. Interlayer coupling in commensurate and incommensurate bilayer structures of transition-metal dichalcogenides. *Physical Review B* **95**, 39–41 (2017).
- [2] Keldysh, L. V. Coulomb interaction in thin semiconductor and semimetal films. *Soviet Journal of Experimental and Theoretical Physics Letters* **29**, 658–660 (1979).
- [3] Szyniszewski, M., Mostaani, E., Drummond, N. D. & Fal’ko, V. I. Binding energies of trions and biexcitons in two-dimensional semiconductors from diffusion quantum Monte Carlo calculations. *Physical Review B* **95** (2017).
- [4] Mostaani, E. *et al.* Diffusion quantum Monte Carlo study of excitonic complexes in two-dimensional transition-metal dichalcogenides. *Physical Review B* **96** (2017).
- [5] Danovich, M. *et al.* Localized interlayer complexes in heterobilayer transition metal dichalcogenides. *Phys. Rev. B* **97**, 195452 (2018).
- [6] Berkelbach, T. C., Hybertsen, M. S. & Reichman, D. R. Theory of neutral and charged excitons in monolayer transition metal dichalcogenides. *Phys. Rev. B* **88**, 045318 (2013).
- [7] Bistritzer, R. & MacDonald, A. H. Moiré bands in twisted double-layer graphene. *Proceedings of the National Academy of Sciences* **108**, 12233 LP – 12237 (2011).
- [8] Ruiz-Tijerina, D. A. & Fal’ko, V. I. Interlayer hybridization and moiré superlattice minibands for excitons in heterobilayers of transition-metal dichalcogenides. *arXiv* 1809.09257 (2018).
- [9] Wallbank, J. R., Patel, A. A., Mucha-Kruczyński, M., Geim, A. K. & Fal’ko, V. I. Generic miniband structure of graphene on a hexagonal substrate. *Physical Review B - Condensed Matter and Materials Physics* **87** (2013).
- [10] Kindermann, M., Uchoa, B. & Miller, D. L. Zero-energy modes and gate-tunable gap in graphene on hexagonal boron nitride. *Physical Review B - Condensed Matter and Materials Physics* **86** (2012).
- [11] Wu, F., Lovorn, T. & Macdonald, A. H. Topological exciton bands in moiré heterojunctions. *Physical Review Letters* **118** (2017).

- [12] Yu, H., Liu, G.-B. B., Tang, J., Xu, X. & Yao, W. Moiré excitons: From programmable quantum emitter arrays to spin-orbitcoupled artificial lattices. *Science Advances* **3**, e1701696 (2017).
- [13] Wu, F., Lovorn, T. & MacDonald, A. Theory of optical absorption by interlayer excitons in transition metal dichalcogenide heterobilayers. *Physical Review B* **97**, 035306 (2018).
- [14] Schrieffer, J. R. & Wolff, P. A. Relation between the Anderson and Kondo Hamiltonians. *Physical Review* **149**, 491–492 (1966).
- [15] Mattheiss, L. F. Band structures of transition-metal-dichalcogenide layer compounds. *Phys. Rev. B* **8**, 3719–3740 (1973).
